# Supplementary material
Source: MDPI journal article supplement (https://www.mdpi.com/2227-7390/11/3/709)
Supplement: s1 [file s1]

# Supplementary: Robust Online Support Vector Regression with Truncated $\varepsilon$ -Insensitive Pinball Loss

Xian Shan , Zheshuo Zhang, Xiaoying Li, Yu Xie and Jinyu You

College of Science, China University of Petroleum, Qingdao 266580, China

\* Correspondence: 20120029@upc.edu.cn

**Definition 1.** [Strong pseudo-convexity] A function  $f : \chi \rightarrow R$  is said to be strongly pseudo-convex (SPC) on  $\chi_1 \subset \chi$  with respect to  $\bar{x} \in \chi$ , if

$$f(x) - f(\bar{x}) \leq K \langle f'(x), x - \bar{x} \rangle \quad (1)$$

holds for all  $x \in \chi_1$ , with  $f'(x)$  a Clarke subgradient of  $f$  at  $x$ ,  $K > 0$  is a constant. If the Inequality (1) holds with respect to any  $\bar{x} \in \chi_1$ ,  $f$  is called SPC on  $\chi_1 \subset \chi$ . The collection of SPC functions on  $\chi_1$  with  $K > 0$  are denoted as  $\mathcal{W}_K(\chi_1)$ .

**Proposition 1.** Let  $f : R \rightarrow R$  be a univariate continuous function. Assume that on each interval of  $(-\infty, a]$ ,  $(a, b)$ ,  $[b, \infty)$ ,  $f(x)$  is convex, and  $f'_-(a) < 0$ ,  $f'_+(b) > 0$ ,  $f'_+(a) \neq 0$ ,  $f'_-(b) \neq 0$ . Then we have that the Inequality (1) holds for any fixed  $\bar{x} \in R$  and  $x \in R$  with

$$K = \max \left\{ 1, \frac{f'_-(a)}{f'_+(a)}, \frac{f'_+(a)}{f'_-(a)}, \frac{f'_-(b)}{f'_+(b)}, \frac{f'_+(b)}{f'_-(b)}, \frac{f'_-(a)}{f'_+(b)}, \frac{f'_+(b)}{f'_-(a)} \right\} \quad (2)$$

**Proposition 2.** Let  $f : R \rightarrow R$  be a univariate continuous function. Let  $a_0 < a_1 < \dots < a_m$  be the real numbers,  $a_0 = -\infty$  and  $a_m = +\infty$ . On each interval of  $[a_i, a_{i+1}]$ ,  $f(x)$  is convex, and  $i = 0, 1, \dots, m-1$ . Let  $S$  be the set of the minimum points of  $f$  on  $R$ . Suppose that the optimal solution set  $S \in [a_q, a_{q+1}]$ . With  $q \in [0, \dots, m-1]$ . Moreover, suppose that  $f(x)$  is strictly decreasing when  $X \leq \text{Inf} S$  and strictly increasing when  $X \geq \text{Sup} S$ . Then, for any fixed  $\bar{x} \in [a_0, a_m]$  and  $x \in [a_0, a_m]$ . Inequality (1) holds with

$$K = \max \left\{ 1, \frac{f'_+(a_\mu)}{f'_-(a_{v+1})}, \frac{f'_-(a_i)}{f'_+(a_j)} \mid q \in [0, \dots, m-1], \mu \in [v+1, \dots, q] \right. \\ \left. v \in [0, \dots, q-1], i \in [q+1, \dots, j], j \in [q+1, \dots, m-1] \right\} \quad (3)$$

**Lemma 1.** Denote  $\Omega_0 = [t_0 - \delta/\tau - C, t_0 - \delta/\tau] \cup [t_0 + \delta, t_0 + \delta + C]$ , suppose that  $0 \notin \Omega_0$ ,  $f(t) = \frac{1}{2}t^2 + C \cdot L_{TIP}((t - t_0))$  is SPC on  $R \setminus \Omega_0$  with  $K = \max \left\{ 2, 1 + \frac{C \cdot \tau^2}{\delta}, 1 + \frac{C \cdot \tau}{\delta \cdot \tau - \varepsilon} \right\}$ .

**Proof:**

Suppose that  $t_0 \leq 0$

$$C \cdot L'_{TIP}(t - t_0) = \begin{cases} -C \cdot \tau, & -\delta/\tau + t_0 \leq t < -\varepsilon/\tau + t_0 \\ 0, & \text{otherwise} \\ C, & \varepsilon + t_0 \leq t < \delta + t_0 \end{cases} \quad (4)$$

$$\left( \frac{1}{2}t^2 \right)' = t \quad (5)$$

Let  $a = t_0 - \delta/\tau$ ,  $b = t_0 + \delta$ ,  $\Omega_1 = (-\infty, a)$ ,  $\Omega_2 = [a, b]$ ,  $\Omega_3 = (b, \infty)$ ,  $\Omega_0 = [a - C, a] \cup [b, b + C]$ .

Case 1:  $t_0 \in [-\varepsilon/\tau, 0]$

We can see that  $f(t)$  is continuous on  $R$  and convex on every interval of  $\Omega_i$ ,  $i = 1, 2, 3$ . The directional derivatives of  $f$  at point  $a$  are calculated as follows:

$$f'_-(a) = a; f'_+(a) = a - C \cdot \tau \quad (6)$$

As  $a < 0$ , the above two directional derivatives are negative. The directional derivatives of  $f$  at point  $b$  are calculated as follows:

$$f'_-(b) = b + C; f'_+(b) = b \quad (7)$$

For  $\delta > \frac{\varepsilon}{\tau}$ ,  $b > 0$ , both of the above two directional derivatives are positive. By Proposition 1, we have  $f(t)$  is strongly pseudoconvex in  $R$  for any fixed  $\bar{t} \in R$ , where

$$K = \max\{1, \frac{a - C \cdot \tau}{a}, \frac{b + C}{b}\} \leq \max\{1 + \frac{C \cdot \tau^2}{\delta}, 1 + \frac{C \cdot \tau}{\tau \cdot \delta - \varepsilon}\}. \quad (8)$$

Case 2:  $t_0 \in [-\delta, -\varepsilon/\tau]$

When  $f'_-(a) = a < 0$ ,  $f'_+(b) = b > 0$ ,  $t^* \in \operatorname{argmin} f \in \Omega_2$  and  $f(t)$  is continuous on  $R$  and convex on every interval of  $\Omega_i$ ,  $i = 1, 2, 3$ . The directional derivative of  $f$  at  $a$  and  $b$  are calculated in the same way with case 1. By Proposition 1, we have  $f(t)$  is strongly pseudoconvex in  $R$  for any fixed  $\bar{t} \in R$ , where

$$K = \max\{1, \frac{a - C \cdot \tau}{a}, \frac{b + C}{b}\} \leq \max\{1 + \frac{C \cdot \tau^2}{\varepsilon + \delta}, 1 + \frac{C}{b}\}. \quad (9)$$

The last equation is  $0 < b < \delta - \varepsilon/\tau$ . Specially, let's consider the strong pseudoconvexity of  $f(t)$  on  $R \setminus \Omega_0$ . Define function  $f(t) : R \rightarrow R$  as follows:

$$\tilde{f} = \begin{cases} f(t), & t \in R \setminus (b, b + C) \\ f(b) + \frac{f(b+C) - f(b)}{C} \cdot t, & t \in [b, b + C] \end{cases} \quad (10)$$

Then  $\tilde{f}(t)$  is a continuous function of one variable and convex on every interval of  $\Omega_1$ ,  $\Omega_2$ ,  $[b, b + C]$  and  $[b + C, \infty]$ . Its directional derivatives at  $a$  are the same as the directional derivatives of  $f$  calculated in Equation (6). Its directional derivatives at  $b$  and  $b + C$  are calculated as

$$\tilde{f}'_-(b) = b + C; \tilde{f}'_+(b + C) = b + C \quad (11)$$

$$\tilde{f}'_-(b + C) = b + \frac{1}{2}C; \tilde{f}'_+(b) = b + \frac{1}{2}C \quad (12)$$

According to Proposition 1, we have  $\tilde{f}(t) \in \chi_K(R)$ , where

$$\begin{aligned} K &= \max\{1, \frac{f'_+(v)}{f'_-(v)}, \frac{f'_-(v)}{f'_+(v)}, \frac{f'_-(b)}{f'_+(b+C)} \mid v \in \{a, b, b + C\}\} \\ &= \max\{1, \frac{a - C \cdot \tau}{a}, \frac{b + C}{b + \frac{1}{2}C}, \frac{b + C}{b + C}\} \\ &\leq \max\{2, 1 + \frac{C \cdot \tau^2}{\delta + \varepsilon}\} \end{aligned} \quad (13)$$

The last two inequalities are true because  $a < -\delta - \varepsilon/\tau < 0$ ,  $b > 0$ . Since  $\tilde{f}(t)$  and  $f(t)$  have the same definition on  $R \setminus \Omega_0$ , we have  $f(t) \in \chi_K(R \setminus \Omega_0)$ ,  $K$  is defined by the above equation.

Case 3:  $t_0 \in (-\infty, -\delta)$

Consider that  $t \in [t_0 + \varepsilon, t_0 + \delta]$ . In this interval,  $f(t) = C \cdot [(t - t_0) - \varepsilon] + \frac{1}{2}t^2$ . Then  $f'(t) = C + t$  is increasing with  $t$ . The assumption of the lemma implies that  $t_0 + \delta < -C$ , then  $\forall t \in [t_0 + \varepsilon, t_0 + \delta]$ ,  $f'(t) < 0$  for  $t \in \Omega_1 \cup \Omega_2$ . In this case,  $f(t)$  is convex on each

interval of  $\Omega_i, i = 1, 2, 3$ , and there exists a unique minimizer  $t^* \in \Omega$  of  $f(t)$ . Moreover,  $f'(t) < 0$  for  $t < t^*$  and  $f'(t) > 0$  for  $t > t^*$ . By Proposition 1, we have that  $f(t)$  is strongly pseudo-convex on  $R$  with

$$\begin{aligned} K &= \max \left\{ 1, \frac{f'_+(v)}{f'_-(v)}, \frac{f'_-(v)}{f'_+(v)}, \frac{f'_-(a)}{f'_+(b)}, \frac{f'_+(b)}{f'_-(a)} \mid v \in \{a, b\} \right\} \\ &= \max \left\{ 1, \frac{a - C \cdot \tau}{a}, \frac{b}{b + C}, \frac{a}{b}, \frac{b}{a} \right\} \\ &\leq \max \left\{ 1 + \frac{C \cdot \tau^2}{\delta \cdot \tau + \delta}, 1 - \frac{C}{b + C}, 1 + \frac{\delta \cdot \tau + \delta}{C \cdot \tau} \right\} \end{aligned} \quad (14)$$

Particularly, let's consider the strong pseudo-convexity of  $f(t)$  on  $R \setminus \Omega_0$ . Consider the function  $\tilde{f}(t) : R \rightarrow R$ . It is observed that  $\tilde{f}$  is a continuous and piecewise-convex function. Its directional derivations at  $b$ , and  $b + C$  are calculated as described above. By Proposition 2, we have that  $f(t) \in \chi_K(R)$  with

$$\begin{aligned} K &= \max \left\{ 1, \frac{f'_+(v)}{f'_-(v)}, \frac{f'_-(v)}{f'_+(v)}, \frac{f'_-(b)}{f'_+(b + C)}, \frac{f'_+(b + C)}{f'_-(b)} \mid v \in \{a, b, b + C\} \right\} \\ &= \max \left\{ 1, \frac{a - C \cdot \tau}{a}, \frac{b + C}{b + \frac{1}{2}C}, \frac{b + C}{b} \right\} \\ &\leq \max \left\{ 2, 1 + \frac{C \cdot \tau^2}{\delta \cdot \tau + \delta}, 1 \right\} \\ &\leq \max \left\{ 2, 1 + \frac{C \cdot \tau^2}{\delta \cdot \tau + \delta} \right\} \end{aligned} \quad (15)$$

Likewise, we can acquire the proof regarding  $t_0 \geq 0$ .

In summary,  $K = \max \left\{ 2, 1 + \frac{C \cdot \tau^2}{\delta \cdot \tau + \delta}, 1 + \frac{C \cdot \tau}{\delta \cdot \tau - \varepsilon} \right\}$ .

**Assumption 1:** We assume that  $X > 0$  exists such that  $K(\mathbf{X}_t, \mathbf{X}_t) \leq X^2$  for all  $t$ . The following proposition could be obtained according to the assumption:

(1) For each  $f \in \mathcal{H}$ ,  $|f(\mathbf{X}_t)| = |\langle f, K(\mathbf{X}_t, -) \rangle| \leq X \cdot \|f\|_{\mathcal{H}}$ .

(2) For given that  $L'_{TIP} < 1$ , we have  $\left\| \partial_f L_{TIP}(f(\mathbf{X}_t) - y_t) \right\|_{\mathcal{H}} \leq \frac{X}{C}$  and

$\left\| \partial_f R_{inst}[f, \mathbf{X}_t, y_t] \right\|_{\mathcal{H}} \leq CX + \|f\|_{\mathcal{H}} \leq 2X$  for any  $f : \|f\|_{\mathcal{H}} \leq X$ .

(3) For fixed  $C > 0$  and  $t = 1, 2, \dots, f^t$  generated by TIPOSVR satisfied  $f : \|f\|_{\mathcal{H}} \leq X$ .

**Proof:**

$$\begin{aligned} \|f^{t+1}\|_{\mathcal{H}} &\leq \|(1 - \gamma_t)f^t - C \cdot \eta_t L'_{TIP}(f(\mathbf{X}_t) - y_t)K(\mathbf{X}_t, \cdot)\|_{\mathcal{H}} \leq (1 - \gamma_t)\|f^t\|_{\mathcal{H}} \\ &+ \gamma_t X \end{aligned}$$

Given  $f^0 = 0$ , we have  $\|f\|_{\mathcal{H}} \leq X$ .

**Lemma 2:** Let the sequence instance  $(\mathbf{X}_t, y_t)$  satisfy  $k(\mathbf{X}_t, \mathbf{X}_t) \leq X^2$ . For a fixed  $g \in \mathcal{H}$

$$u^t = (f^t - g) / \|f^t - g\|, t_0 = y_t - g(\mathbf{X}_t) + u^t(\mathbf{X}_t) \cdot \langle u^t, g \rangle,$$

$$\Omega_0 = \left[ -\delta/\tau - (u^t(\mathbf{X}_t))^2, -\delta/\tau \right] \cup \left[ \delta, \delta + (u^t(\mathbf{X}_t))^2 \right]$$

Assuming  $t_0 \notin \Omega_0, \xi_t = f^t(\mathbf{X}_t) - y_t \notin \Omega_0$ , we have

$$R_{inst}[f^t, \mathbf{X}_t, y_t] - R_{inst}[g, \mathbf{X}_t, y_t] \leq K \cdot \left\langle \partial_f R_{inst}[f^t, \mathbf{X}_t, y_t] \Big|_{f=f^t}, f^t - g \right\rangle_{\mathcal{H}} \text{ with}$$

$$K = \max \left\{ 2, 1 + \frac{C \cdot \tau^2 X^2}{\delta}, 1 + \frac{C \cdot \tau X^2}{\delta \cdot \tau - \varepsilon} \right\}. \quad (16)$$

**Proof:**

Let  $f = g + \alpha u^t$ ,  $\|u^t\| = 1$ .

According to the definition of  $R_{inst}$ :

$$R_{inst}[f, \mathbf{X}_t, y_t] = C \cdot L_{TIP}[g(\mathbf{X}_t) + \alpha u^t(\mathbf{X}_t) - y_t] + \frac{1}{2}\|g + \alpha u^t\|^2 + \text{constant},$$

Let  $\xi = g(\mathbf{X}_t) + \alpha u^t(\mathbf{X}_t) - y_t \in R$ ,  $t_0 = y_t - g(\mathbf{X}_t) + u^t(\mathbf{X}_t)(u^t, g)$ ,

$$\xi + t_0 = \alpha u^t(\mathbf{X}_t) + u^t(\mathbf{X}_t)(u^t, g) = u^t(\mathbf{X}_t)[\alpha + (u^t, g)]$$

With the definition of  $\|u^t\| = 1$ ,  $R_{inst}[f, \mathbf{X}_t, y_t]$  satisfies the strong pseudoconvex inequality, i.e.,

$$R_{inst}[f^t, \mathbf{X}_t, y_t] - R_{inst}[g, \mathbf{X}_t, y_t] \leq K \cdot \left\langle \partial_f R_{inst}[f^t, \mathbf{X}_t, y_t] \Big|_{f=f^t}, f^t - g \right\rangle_{\mathcal{H}}$$

holds as the univariate function on the right-hand side of as  $\alpha$  is strongly pseudoconvex.

We have

$$\phi(\xi) = R_{inst}[f, \mathbf{X}_t, y_t] = C \cdot L_{TIP}[\xi] + \frac{1}{2[u^t(\mathbf{X}_t)]^2}[\xi + t_0]^2 + \text{constant}$$

Therefore, according to the above lemma,  $\phi(\xi + t_0)$  satisfies strong pseudoconvexity when  $\xi \in R \setminus \Omega_0$  with

$$\begin{aligned} K &= \max \left\{ 2, 1 + \frac{C \cdot \tau^2 [u^t(\mathbf{X}_t)]^2}{\delta}, 1 + \frac{C \cdot \tau [u^t(\mathbf{X}_t)]^2}{\delta \cdot \tau - \varepsilon} \right\} \\ &\leq \max \left\{ 2, 1 + \frac{C \cdot \tau^2 X^2}{\delta}, 1 + \frac{C \cdot \tau X^2}{\delta \cdot \tau - \varepsilon} \right\}. \end{aligned} \quad (17)$$

**Theorem 1:** Set example sequence  $S = \{(\mathbf{X}_t, y_t)\}_{t=0}^T$  be  $k(\mathbf{X}_t, \mathbf{X}_t) \leq X^2$  holds for all  $t$ .  $(f^0, \dots, f^T)$  represents a hypothetical sequence produced by TIPOSVR,  $R_{inst}[g, S] = \frac{1}{T} \sum_{t=1}^T R_{inst}[g, \mathbf{X}_t, y_t]$ , and  $\hat{g} = \arg \min_{g \in \mathcal{H}} R_{inst}[g, S]$ . Fixed  $C, \varepsilon > 0, 0 < \eta < C$  and set the learning rate  $\eta_t = \eta \cdot t^{-1/2}$ . We assume that each hypothesis  $f^t$  generated by TIPOSVR satisfies the hypothesis stated in Lemma 2, for  $t = 0, 1, 2 \dots T$ . And then we have the following expression

$$\frac{1}{T} \sum_{t=1}^T R_{inst}[f^t, \mathbf{X}_t, y_t] \leq R_{inst}[\hat{g}, S] + \alpha T^{-1/2} + o(T^{-1/2}) \quad (18)$$

Among them,  $\alpha = \frac{2KX^2}{\eta} + 4KX^2\eta$ ,  $K = \max \left\{ 2, 1 + \frac{C \cdot \tau^2 X^2}{\delta}, 1 + \frac{C \cdot \tau X^2}{\delta \cdot \tau - \varepsilon} \right\}$

**Proof:**

From the strong pseudo-convexity of  $R_{inst}$  in lemma 2 and the Lipschitz property of  $R_{inst}$  in the first argument, the following expressions are derived:

$$\begin{aligned} &\|f^t - \hat{g}\|_{\mathcal{H}}^2 - \|f^{t+1} - \hat{g}\|_{\mathcal{H}}^2 \\ &= -\|f^{t+1} - f^t\|_{\mathcal{H}}^2 - \left\langle f^{t+1} - f^t, f^{t+1} - \hat{g} \right\rangle_{\mathcal{H}} \\ &= -\eta_t^2 \left\| \partial_f R_{inst}[f^t, \mathbf{X}_t, y_t] \right\|_{\mathcal{H}}^2 + 2\eta_t \left\langle \partial_f R_{inst}[f^t, \mathbf{X}_t, y_t] \Big|_{f=f^t}, f^t - \hat{g} \right\rangle_{\mathcal{H}} \\ &\geq -4\eta_t^2 X^2 - \frac{2\eta_t}{K} (R_{inst}[\hat{g}, \mathbf{X}_t, y_t] - R_{inst}[f^t, \mathbf{X}_t, y_t]) \end{aligned}$$

Here,  $K = \max \left\{ 2, 1 + \frac{C \cdot \tau^2 X^2}{\delta}, 1 + \frac{C \cdot \tau X^2}{\delta \cdot \tau - \varepsilon} \right\}$ ,

Then there are

$$\begin{aligned}
& \frac{1}{\eta_t} \|f^t - \hat{g}\|_{\mathcal{H}}^2 - \frac{1}{\eta_{t+1}} \|f^{t+1} - \hat{g}\|_{\mathcal{H}}^2 \\
&= \frac{1}{\eta_t} \left( \|f^t - \hat{g}\|_{\mathcal{H}}^2 - \|f^{t+1} - \hat{g}\|_{\mathcal{H}}^2 \right) + \left( \frac{1}{\eta_t} - \frac{1}{\eta_{t+1}} \right) \|f^{t+1} - \hat{g}\|_{\mathcal{H}}^2 \\
&\geq -4\eta_t X^2 - \frac{2}{K} \left( R_{inst}[\hat{g}, \mathbf{X}_t, y_t] - R_{inst}[f^{t+1}, \mathbf{X}_t, y_t] \right) + \left( \frac{1}{\eta_t} - \frac{1}{\eta_{t+1}} \right) 4X^2
\end{aligned}$$

Considering  $\|f^{t+1} - \hat{g}\|_{\mathcal{H}} \leq 2X$ ,  $\eta_{T+1} = \eta(T+1)^{-1/2}$ , by summing  $\sum_{t=1}^T \eta_t \leq 2\eta T^{1/2}$ , we get the following expression

$$\begin{aligned}
& \frac{1}{\eta} \|f^1 - \hat{g}\|_{\mathcal{H}}^2 - \frac{1}{\eta_{T+1}} \|f^{T+1} - \hat{g}\|_{\mathcal{H}}^2 \\
&\geq \sum_{t=1}^T -4\eta_t X^2 - \frac{2}{K} \sum_{t=1}^T (R_{inst}[\hat{g}, \mathbf{X}_t, y_t] - R_{inst}[f^t, \mathbf{X}_t, y_t]) + \left( \frac{1}{\eta} - \frac{1}{\eta_{T+1}} \right) 4X^2
\end{aligned}$$

So,

$$\begin{aligned}
& -\frac{2}{K} \sum_{t=1}^T (R_{inst}[\hat{g}, \mathbf{X}_t, y_t] - R_{inst}[f^t, \mathbf{X}_t, y_t]) \\
&\leq \frac{1}{\eta} \|f^1 - \hat{g}\|_{\mathcal{H}}^2 - \frac{1}{\eta_{T+1}} \|f^{T+1} - \hat{g}\|_{\mathcal{H}}^2 - \left( \frac{1}{\eta} - \frac{(T+1)^{1/2}}{\eta} \right) 4X^2 + 8\eta X^2 T^{1/2} \\
&\leq \frac{4X^2}{\eta} - \frac{(2X)^2}{\eta_{T+1}} + \frac{(T+1)^2 - 1}{\eta} 4X^2 + 8\eta X^2 T^{1/2} \\
&\leq \frac{X^2}{\eta} + \frac{T^{1/2}}{\eta} 4X^2 + 8\eta X^2 T^{1/2}
\end{aligned}$$

And we can get,

$$\begin{aligned}
& -\frac{1}{T} \sum_{t=1}^T (R_{inst}[\hat{g}, \mathbf{X}_t, y_t] - R_{inst}[f^t, \mathbf{X}_t, y_t]) \\
&\leq \frac{2KX^2}{\eta} T^{-1} + 4KX^2 \eta T^{-1/2} + \frac{2KX^2}{\eta} T^{-1/2} \\
&= \frac{2KX^2}{\eta} T^{-1} + \alpha T^{-1/2} \\
&\alpha = \frac{2KX^2}{\eta} + 4KX^2 \eta.
\end{aligned}$$
